# Supplementary material
Source: PubMed Central journal article supplement (PMC3185110)
Supplement: NIHMS312841-supplement.pdf [file NIHMS312841-supplement.pdf]

## Supporting Information

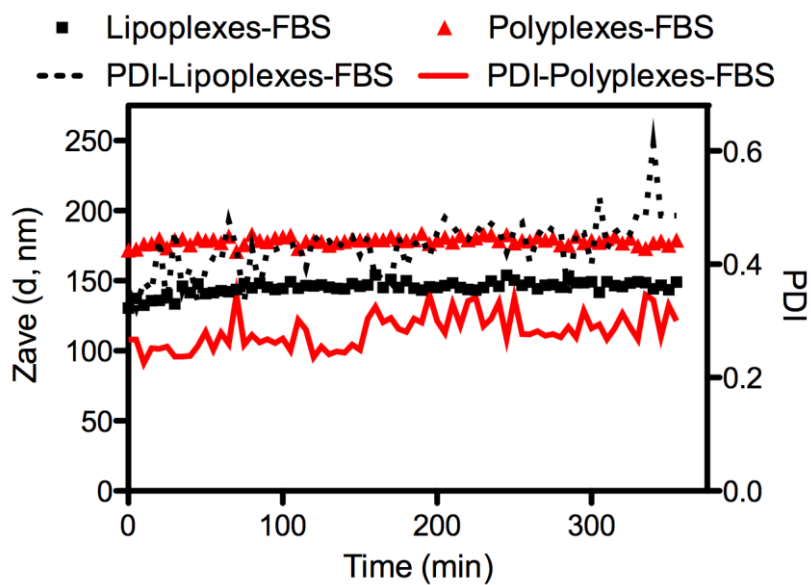

**Figure 1s** Sizes of lipoplexes and polyplexes in 10% FBS in PBS over a 6-hour period. Both lipoplexes and polyplexes exhibited good stability.

(a)

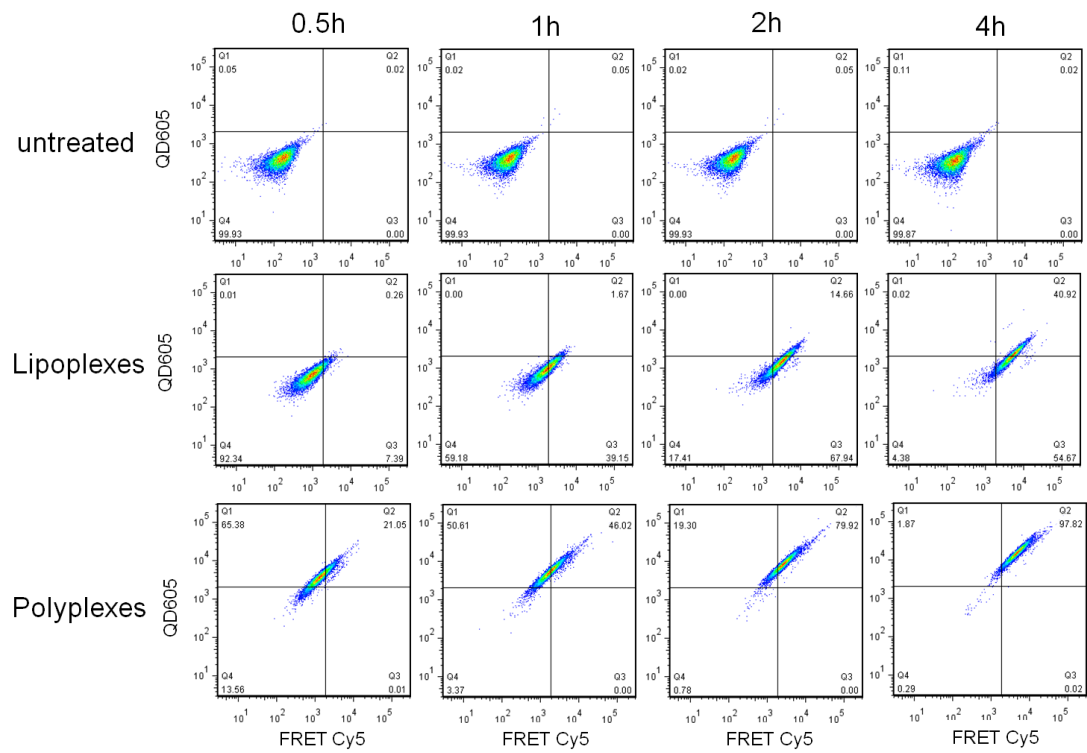

(b)

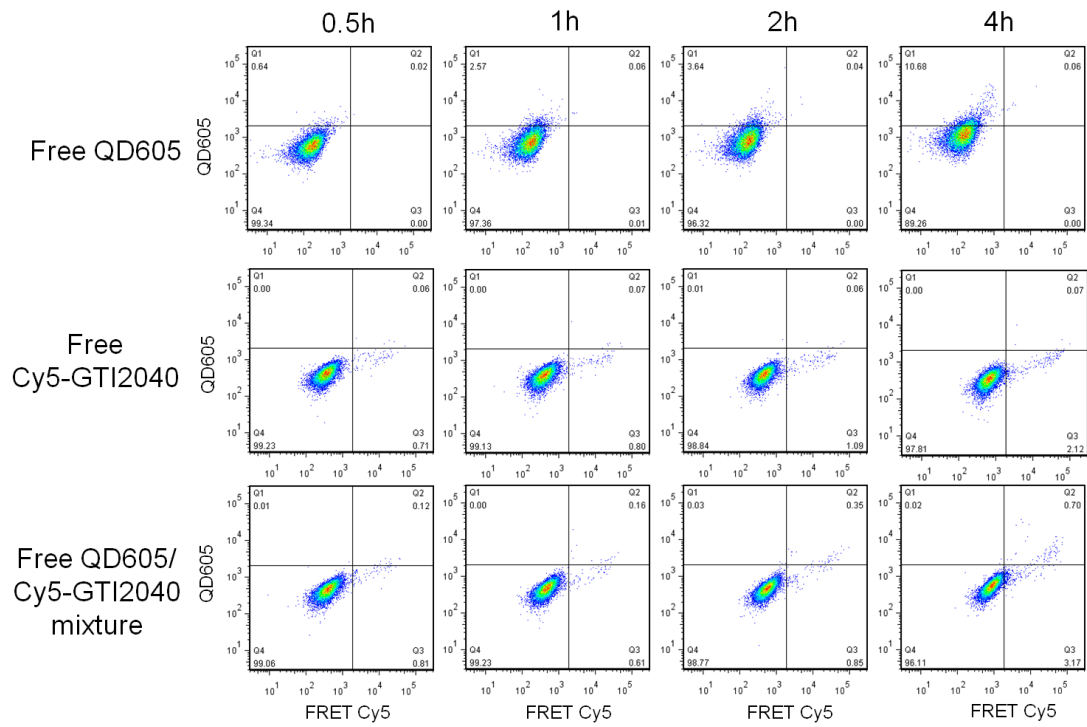

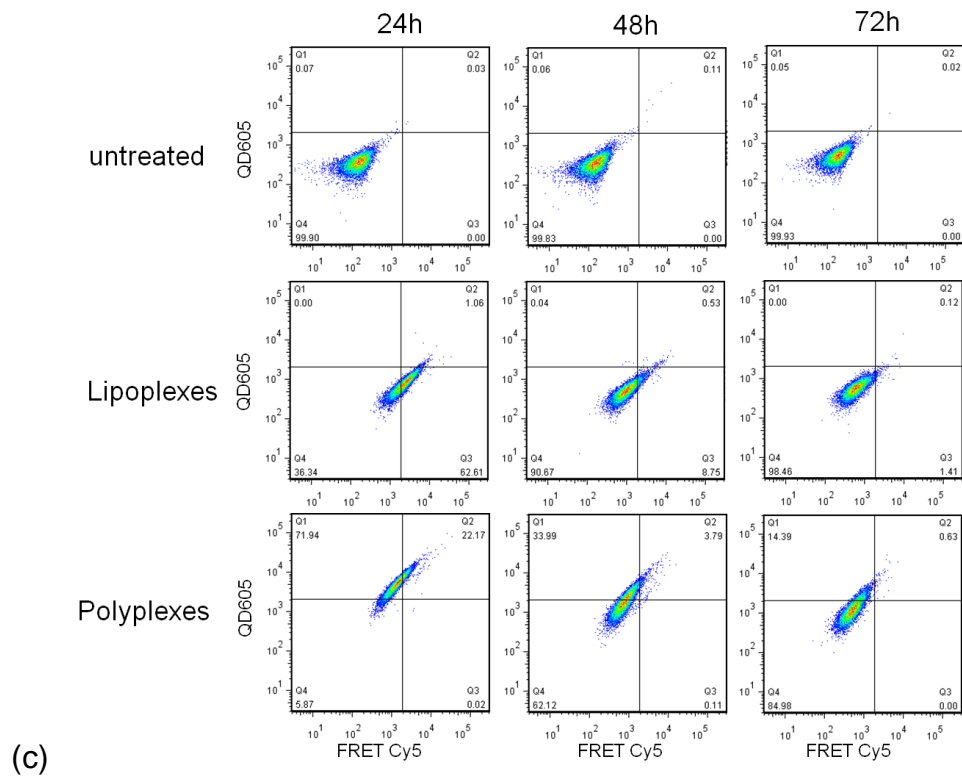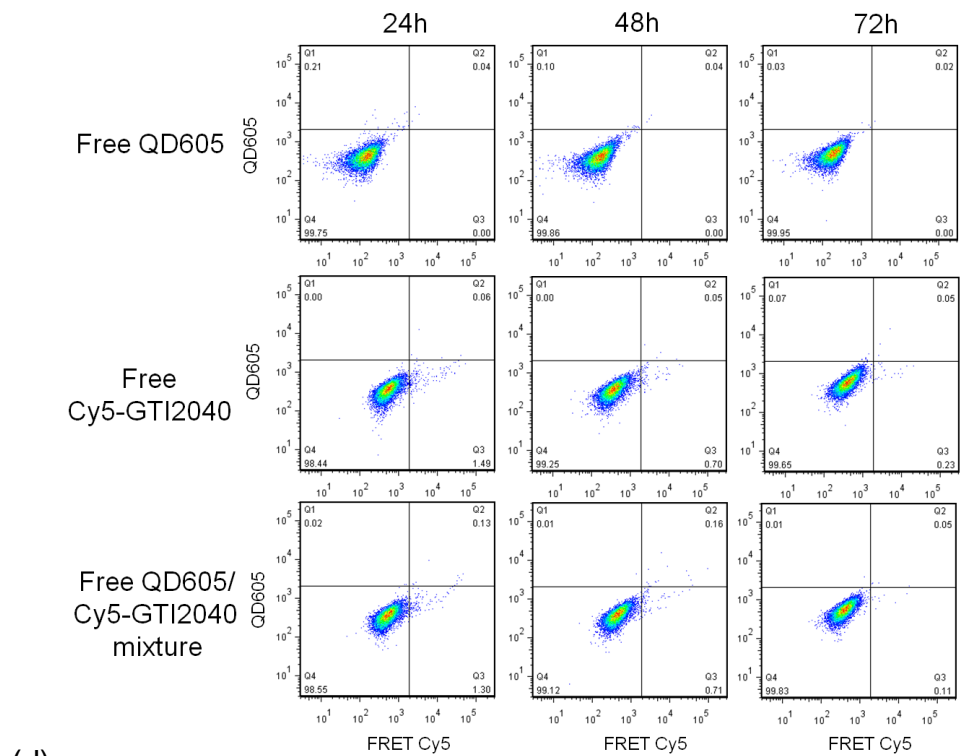

**Figure 2s** Cellular uptake and intracellular fate of QD605/Cy5-GTI2040 lipoplexes and polyplexes via flow cytometry analysis. (a-d) Representative flow cytometry data showing the fluorescence intensity change of QD605 and FRET Cy5 0.5, 1, 2, 4, 24, 48 and 72 h after the cells were treated with lipoplexes and polyplexes at Cy5-GTI2040 concentration of  $1\mu\text{M}$ .

Table 1s Size and surface charge of lipoplexes and polyplexes used in this study

| <b>Sample</b>            | <b>Size (nm)</b> | <b>Polydispersity index (PDI)</b> | <b>PDI Width (nm)</b> | <b>Zeta Potential (mV)</b> | <b>Stdev (mV)</b> |
|--------------------------|------------------|-----------------------------------|-----------------------|----------------------------|-------------------|
| GTI2040 lipoplexes       | 125.10           | 0.17                              | 51.88                 | 22.24                      | 1.29              |
| Cy5-GTI2040 lipoplexes   | 166.70           | 0.19                              | 72.09                 | 4.47                       | 0.51              |
| QD605/GTI2040 lipoplexes | 131.70           | 0.23                              | 63.16                 | 17.20                      | 0.49              |
| GTI2040 polyplexes       | 88.06            | 0.32                              | 49.89                 | 7.78                       | 1.79              |
| Cy5-GTI2040 polyplexes   | 97.91            | 0.08                              | 28.04                 | 9.41                       | 0.67              |
| QD605/GTI2040 polyplexes | 198.80           | 0.08                              | 56.93                 | 8.36                       | 0.56              |
